# Supplementary material for: Spatiotemporal variability of sedimentary organic matter supply and recycling processes in coral reefs of Tayrona National Natural Park, Colombian Caribbean
Source: Copernicus journal article supplement (doi:10.5194/bg-11-2977-2014), 2014-06-06
Supplement: Supplementary file 2 [file bg-11-2977-2014-supplement.zip]

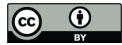

*Supplement of*

**Spatiotemporal variability of sedimentary organic matter supply and recycling processes in coral reefs of Tayrona National Natural Park, Colombian Caribbean**

**E. Bayraktarov and C. Wild**

*Correspondence to:* E. Bayraktarov ([elisa.bayraktarov@uni-bremen.de](mailto:elisa.bayraktarov@uni-bremen.de))

- Supplement-Cover-Letter.pdf
- bg-2013-560-supplement-version3.pdf
- fS1.tif
- fS2.tif
- fS3.tif
- fS4.tif
- fS5.tif
